# Supplementary material
Source: Springer Nature journal article supplement (https://www.springermedizin.de/resource/supplementary/12876_2012_796_MOESM3_ESM.pdf/9437516)

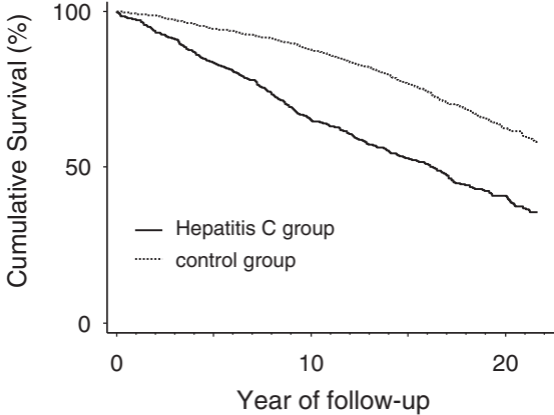

Patients at risk

| Time (yr)         | 5    | 10   | 15  | 20  |
|-------------------|------|------|-----|-----|
| Hepatitis C group | 631  | 442  | 296 | 100 |
| Control group     | 1474 | 1239 | 895 | 374 |

Supplement: MOESM3 [file 9437516]
